# Supplementary material for: Fungicide Sensitivity among Isolates of Colletotrichum truncatum and Fusarium incarnatum-equiseti Species Complex Infecting Bell Pepper in Trinidad
Source: PubMed Central journal article supplement — Plant Pathol J. 2017 Apr 1;33(2):118–24. doi: 10.5423/PPJ.OA.06.2016.0138 (PMC5378432; doi:10.5423/ppj.oa.06.2016.0138), 2017-04-01
Supplement: ppj-33-118_suppl.2.pdf [file ppj-33-118_suppl.2.pdf]

**Supplementary Table S2. Analysis of variance analyses (ANOVA)**

**(a) Variance in LogEC<sub>50</sub> values according to fungicide**

| Source    | DF | SS     | MS     | F     | <i>P</i> |
|-----------|----|--------|--------|-------|----------|
| Fungicide | 3  | 549.24 | 183.08 | 28.58 | 0.000    |
| Error     | 8  | 51.24  | 6.41   |       |          |
| Total     | 11 | 600.48 |        |       |          |

**(b) Variance in LogEC<sub>50</sub> values according to species**

| Source  | DF | SS     | MS    | F    | <i>P</i> |
|---------|----|--------|-------|------|----------|
| Species | 1  | 5.55   | 5.55  | 0.12 | 0.729    |
| Error   | 18 | 806.77 | 44.82 |      |          |
| Total   | 19 |        |       |      |          |

**(c) Variance in LogEC<sub>50</sub> values according to location**

| Source   | DF | SS     | MS    | F    | <i>P</i> |
|----------|----|--------|-------|------|----------|
| Location | 2  | 25.35  | 12.67 | 0.27 | 0.764    |
| Error    | 17 | 786.98 | 46.29 |      |          |
| Total    | 19 |        |       |      |          |

**(d) (i) Variance in LogEC<sub>50</sub> values according to species and fungicide (South isolates included for comparison)**

| Source            | DF | SS     | MS    | F    | <i>P</i> |
|-------------------|----|--------|-------|------|----------|
| Species*Fungicide | 7  | 487.03 | 69.58 | 2.57 | 0.073    |
| Error             | 12 | 325.29 | 27.11 |      |          |
| Total             | 19 |        |       |      |          |

**(ii) Variance in LogEC<sub>50</sub> values according to species and fungicide (South isolates not included for comparison)**

| Source            | DF | SS     | MS    | F    | P     |
|-------------------|----|--------|-------|------|-------|
| Species*Fungicide | 7  | 358.32 | 51.19 | 1.49 | 0.293 |
| Error             | 8  | 274.8  | 34.35 |      |       |
| Total             | 15 | 633.12 |       |      |       |

**(e) Variance in LogEC50 values according to species and location**

| Source           | DF | SS     | MS    | F    | P     |
|------------------|----|--------|-------|------|-------|
| Species*Location | 3  | 66.23  | 22.07 | 0.47 | 0.711 |
| Error            | 12 | 566.89 | 47.24 |      |       |
| Total            | 15 | 633.12 |       |      |       |

**(f) Variance in LogEC50 values according to fungicide and location**

| Source             | DF | SS     | MS    | F    | P     |
|--------------------|----|--------|-------|------|-------|
| Fungicide*Location | 7  | 351.13 | 50.16 | 1.42 | 0.314 |
| Error              | 8  | 281.98 | 35.25 |      |       |
| Total              | 15 | 633.12 |       |      |       |

**(g) Variance in LogEC50 values according to fungicide for only FIESC isolates**

| Source    | DF | SS     | MS    | F    | P     |
|-----------|----|--------|-------|------|-------|
| Fungicide | 3  | 292.28 | 97.43 | 2.30 | 0.219 |
| Error     | 4  | 169.52 | 42.38 |      |       |
| Total     | 7  | 461.79 |       |      |       |

**(h) Variance in LogEC50 values according to location for only FIESC isolates**

| Source   | DF | SS     | MS    | F    | <i>P</i> |
|----------|----|--------|-------|------|----------|
| Location | 1  | 0.52   | 0.52  | 0.01 | 0.937    |
| Error    | 6  | 461.28 | 76.88 |      |          |
| Total    | 7  | 461.79 |       |      |          |

**(i) Variance in LogEC50 values according to fungicide for only *C. truncatum* isolates**

| Source    | DF | SS     | MS    | F    | <i>P</i> |
|-----------|----|--------|-------|------|----------|
| Fungicide | 3  | 189.19 | 63.07 | 3.24 | 0.082    |
| Error     | 8  | 155.77 | 19.47 |      |          |
| Total     | 11 | 344.97 |       |      |          |

**(j) Variance in LogEC50 values according to location for only *C. truncatum* isolates**

| Source   | DF | SS     | MS    | F    | <i>P</i> |
|----------|----|--------|-------|------|----------|
| Location | 2  | 60.59  | 30.29 | 0.96 | 0.419    |
| Error    | 9  | 284.38 | 31.59 |      |          |
| Total    | 11 | 344.97 |       |      |          |

DF – degrees of freedom

SS – sum of squares

MS – mean sum of squares

*P* is significant at values  $\leq 0.05$
